# Supplementary material for: Legionnaires’ Disease Outbreaks and Cooling Towers, New York City, New York, USA
Source: PubMed Central journal article supplement (PMC5652439; doi:10.3201/eid2311.161584), 2017-11
Supplement: 16-1584-Techapp-s1.pdf [file 16-1584-Techapp-s1.pdf]

**Technical Appendix Figure.** Epidemic curves for 6 Legionnaires' disease outbreaks, by illness onset date, New York City, New York, USA, 2006–2015. For outbreak 5, onset dates are missing for 5 cases.
